# Supplementary material for: MicroRNA-370 carried by M2 macrophage-derived exosomes alleviates asthma progression through inhibiting the FGF1/MAPK/STAT1 axis
Source: PubMed Central journal article supplement (PMC8120458; doi:10.7150/ijbs.59715), 2021-04-23
Supplement: ijbsv17p1795s1.pdf [file ijbsv17p1795s1.pdf]

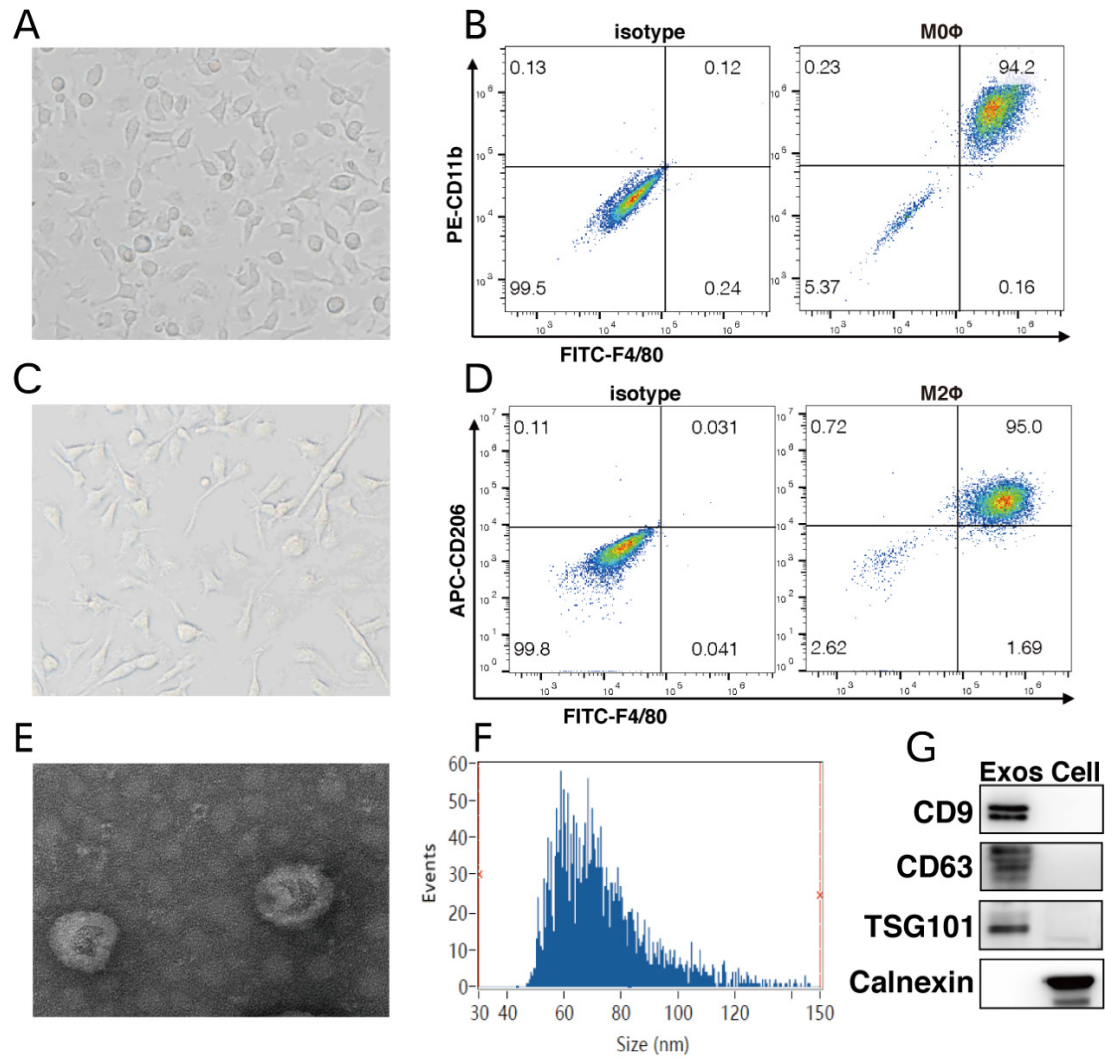

**Fig. S1 Identification of M2 macrophages and the M2Φ-Exos.** (A) Morphologic analysis of BMDMs under a microscope. (B) Expression of macrophage surface biomarkers CD11b and F4/80 determined by flow cytometry. (C) Morphologic analysis of BMDMs after IL-4 induction under a microscope. (D) M2 macrophage surface biomarkers CD206 determined by flow cytometry. (E) Shape of the particles evaluated under a TEM. (F) Particle size analyzed by nanoanalysis. (G) Expression of exosome marker proteins CD9, CD63 and TSG101 as well as cell marker protein Calnexin determined by Western Blot.

**Table1.** List of primers

| <b>Gene</b>        | <b>Primer sequence(5'-3')</b>                        |
|--------------------|------------------------------------------------------|
| <u>Fibronectin</u> | F:ATGTGGACCCCTCCTGATAGT<br>R: GCCCAGTGATTCAGCAAAGG   |
| <u>Vimentin</u>    | F:GCTGCGAGAGAAATTGCAGGA<br>R:CCACTTTCCGTTCAAGGTCAAG  |
| FGF1               | F: GGGGAGATCACAACCTTCGC<br>R: GTCCCTTGCCCATCCACG     |
| GAPDH              | F: AGGTCGGTGTGAACGGATTTG<br>R: GGGGTCGTTGATGGCAACA   |
| miR-370            | F: CTGCTGGGGTGGAACT<br>R: GAACATGTCTGCGTATCTC        |
| U6                 | F:GTCTCCTCTGACTTCAACAGCG<br>R:ACCACCCTGTTGCTGTAGCCAA |
